# Supplementary material
Source: Springer Nature journal article supplement (https://www.springermedizin.de/resource/supplementary/13550_2012_132_MOESM6_ESM.pdf/9687654)

**Example voxel activity vs. gate (including gate and inter-gate values)**

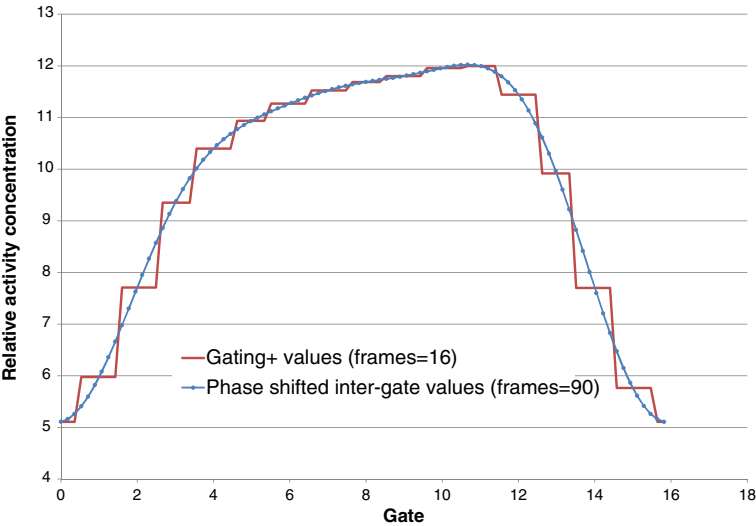

Supplement: MOESM6 [file 9687654]
